# Supplementary material for: Development and validation of a combined ultrasound-pathology model to predict axillary status after neoadjuvant systemic therapy in breast cancer
Source: PubMed Central journal article supplement (PMC11539384; doi:10.7150/ijms.101855), 2024-10-21
Supplement: ijmsv21p2714s1.pdf [file ijmsv21p2714s1.pdf]

**Supplementary Table 1.** The characteristics of patients before NST, after NST, and after the operation.

| Characteristics                   | Training group | Validation group | <i>p</i> value |
|-----------------------------------|----------------|------------------|----------------|
|                                   | N=460, %       | N=197, %         |                |
| <b>Before NST</b>                 |                |                  |                |
| Age at diagnosis, year            | 49.0 ± 10.4    | 48.9 ± 9.9       | 0.931          |
| Menopausal status                 |                |                  | 0.675          |
| Pre-menopausal                    | 244 (53.0)     | 108 (54.8)       |                |
| Post-menopausal                   | 216 (47.0)     | 89 (45.2)        |                |
| Tumor location                    |                |                  | 0.286          |
| Left breast                       | 252 (54.8)     | 99 (50.3)        |                |
| Right breast                      | 208 (45.2)     | 98 (49.7)        |                |
| Clinical tumor size, cT           |                |                  | 0.981          |
| cT1                               | 41 (8.9)       | 17 (8.6)         |                |
| cT2                               | 326 (70.9)     | 139 (70.6)       |                |
| cT3/4                             | 93 (20.2)      | 41 (20.8)        |                |
| Clinical lymph nodes, cN          |                |                  | 0.187          |
| cN1                               | 243 (52.8)     | 93 (47.2)        |                |
| cN2/3                             | 217 (47.2)     | 104 (52.8)       |                |
| Involved ALNs of level II         |                |                  | 0.585          |
| Yes                               | 195 (42.4)     | 79 (40.1)        |                |
| No                                | 265 (57.6)     | 118 (59.9)       |                |
| Hilum structure of ALNs           |                |                  | 0.887          |
| Presence                          | 192 (41.7)     | 81 (41.1)        |                |
| Partial/Eccentric/Narrow presence | 95 (20.7)      | 44 (22.3)        |                |
| Absence                           | 173 (37.6)     | 72 (36.5)        |                |
| Blood of ALNs                     |                |                  | 0.474          |
| Rich                              | 278 (60.4)     | 129 (65.5)       |                |
| Not rich/Absent                   | 153 (33.3)     | 57 (28.9)        |                |
| Unknown                           | 29 (6.3)       | 11 (5.6)         |                |
| ER status                         |                |                  | 0.774          |
| Positive                          | 270 (58.7)     | 118 (59.9)       |                |
| Negative                          | 190 (41.3)     | 79 (40.1)        |                |
| PR status                         |                |                  | 0.555          |
| Positive                          | 201 (43.7)     | 91 (46.2)        |                |

|                                   |             |             |       |
|-----------------------------------|-------------|-------------|-------|
| Negative                          | 259 (56.3)  | 106 (53.8)  |       |
| HER2 status                       |             |             | 0.453 |
| Positive                          | 199 (43.3)  | 79 (40.1)   |       |
| Negative                          | 261 (56.7)  | 118 (59.9)  |       |
| Ki-67 expression, %               | 48.3 ± 22.2 | 46.4 ± 22.3 | 0.338 |
| <b>After NST</b>                  |             |             |       |
| Clinical tumor response           |             |             | 0.266 |
| CR                                | 48 (10.4)   | 19 (9.6)    |       |
| PR                                | 315 (68.5)  | 125 (63.5)  |       |
| PD/SD                             | 97 (21.1)   | 53 (26.9)   |       |
| Involved ALNs of level II         |             |             | 0.675 |
| Yes                               | 64 (13.9)   | 25 (12.7)   |       |
| No                                | 396 (86.1)  | 172 (87.3)  |       |
| Hilum structure of ALNs           |             |             | 0.775 |
| Presence                          | 337 (73.3)  | 145 (73.6)  |       |
| Partial/Eccentric/Narrow presence | 64 (13.9)   | 24 (12.2)   |       |
| Absence                           | 59 (12.8)   | 28 (14.2)   |       |
| Blood of ALNs                     |             |             | 0.840 |
| Rich                              | 153 (33.3)  | 64 (32.5)   |       |
| Not rich/Absent                   | 284 (61.7)  | 125 (63.5)  |       |
| Unknown                           | 23 (5.0)    | 8 (4.1)     |       |
| <b>After operation</b>            |             |             |       |
| Operations of breast              |             |             | 0.848 |
| Mastectomy                        | 411 (89.3)  | 177 (89.8)  |       |
| Lumpectomy                        | 49 (10.7)   | 20 (10.2)   |       |
| Pathological size, mm             | 13.7 ± 16.2 | 15.3 ± 16.5 | 0.241 |
| Vascular invasion                 |             |             | 0.398 |
| Yes                               | 74 (16.1)   | 37 (18.8)   |       |
| No                                | 386 (83.9)  | 160 (81.2)  |       |
| Nerve invasion                    |             |             | 0.488 |
| Yes                               | 22 (4.8)    | 12 (6.1)    |       |
| No                                | 438 (95.2)  | 185 (93.9)  |       |
| Miller-Payne grade                |             |             | 0.601 |
| 1-3                               | 249 (54.1)  | 111 (56.3)  |       |

---

4-5

211 (45.9)

86 (43.7)

---

Abbreviations: ALNs, axillary lymph nodes; CR, complete response; PR, partial response; SD, stable disease; PD, progressive disease

**Supplementary Table 2.** The characteristics of pathologically-node positive patients who received FNA after NST.

| Characteristics           | FNA (-)     | FNA (+)     | <i>p</i> value |
|---------------------------|-------------|-------------|----------------|
|                           | N=110, %    | N=39, %     |                |
| Age at diagnosis, year    | 48.9 ± 10.2 | 48.7 ± 9.0  | 0.929          |
| Menopausal status         |             |             | 0.565          |
| Pre-menopausal            | 59 (53.6)   | 23 (59.0)   |                |
| Post-menopausal           | 51 (46.4)   | 16 (41.0)   |                |
| Tumor location            |             |             | 0.281          |
| Left breast               | 70 (63.6)   | 21 (53.8)   |                |
| Right breast              | 40 (36.4)   | 18 (46.2)   |                |
| Clinical tumor size (cT)  |             |             | 0.938          |
| cT1                       | 8 (7.3)     | 2 (5.1)     |                |
| cT2                       | 80 (72.7)   | 29 (74.4)   |                |
| cT3                       | 13 (11.8)   | 4 (10.3)    |                |
| cT4                       | 9 (8.2)     | 4 (10.3)    |                |
| Clinical lymph nodes (cN) |             |             | 0.950          |
| cN1                       | 60 (54.5)   | 22 (56.4)   |                |
| cN2                       | 34 (30.9)   | 11 (28.2)   |                |
| cN3                       | 16 (14.5)   | 6 (15.4)    |                |
| ER status                 |             |             | 0.307          |
| Positive                  | 69 (62.7)   | 28 (71.8)   |                |
| Negative                  | 41 (37.3)   | 11 (28.2)   |                |
| PR status                 |             |             | 0.281          |
| Positive                  | 51 (46.4)   | 22 (56.4)   |                |
| Negative                  | 59 (53.6)   | 17 (43.6)   |                |
| HER2 status               |             |             | < 0.001        |
| Positive                  | 65 (59.1)   | 9 (23.1)    |                |
| Negative                  | 45 (40.9)   | 30 (76.9)   |                |
| Ki-67 expression, %       | 46.2 ± 21.1 | 42.4 ± 23.5 | 0.344          |
| Clinical tumor response   |             |             | 0.003          |
| CR                        | 16 (14.5)   | 0 (0)       |                |
| PR                        | 76 (69.1)   | 24 (61.5)   |                |
| SD                        | 16 (14.5)   | 15 (38.5)   |                |
| PD                        | 2 (1.8)     | 0 (0)       |                |

|                       |            |             |         |
|-----------------------|------------|-------------|---------|
| Operations of breast  |            |             | 0.015   |
| Mastectomy            | 95 (86.4)  | 39 (100)    |         |
| Lumpectomy            | 15 (13.6)  | 0 (0)       |         |
| Pathological size, mm | 9.8 ± 13.7 | 24.2 ± 19.5 | < 0.001 |
| Vascular invasion     |            |             | 0.011   |
| Yes                   | 14 (12.7)  | 12 (30.8)   |         |
| No                    | 96 (87.3)  | 27 (69.2)   |         |
| Nerve invasion        |            |             | 0.684   |
| Yes                   | 4 (3.6)    | 2 (5.1)     |         |
| No                    | 106 (96.4) | 37 (94.9)   |         |
| Miller-Payne grade    |            |             | < 0.001 |
| 1-3                   | 42 (38.2)  | 32 (82.1)   |         |
| 4-5                   | 68 (61.8)  | 7 (17.9)    |         |
| Axillary pCR          |            |             | < 0.001 |
| Yes                   | 66 (60.0)  | 0           |         |
| No                    | 44 (40.0)  | 39 (100)    |         |

Abbreviations: FNA, fine-needle aspiration; ALNs, axillary lymph nodes; CR, complete response; PR, partial response; SD, stable disease; PD, progressive disease

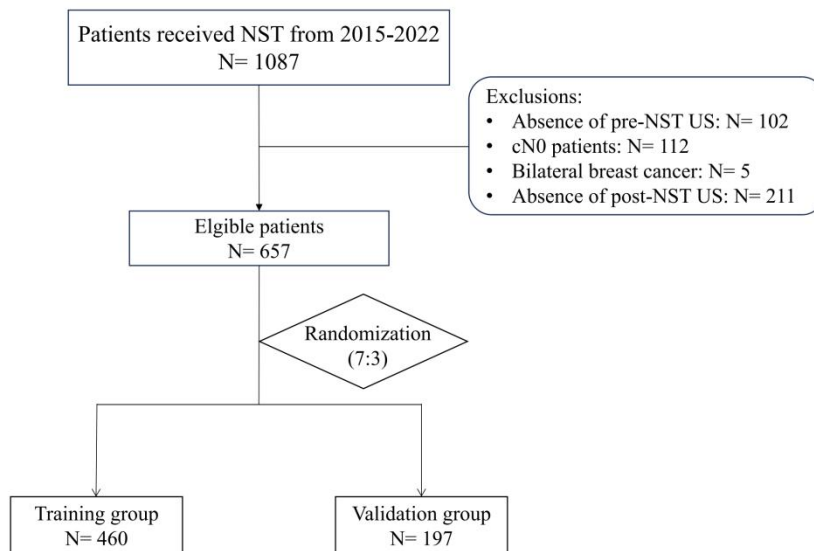

**Supplementary Figure 1.** Study flowchart. NST, neoadjuvant systemic therapy; US, ultrasound; cN0, clinically negative axillary lymph nodes

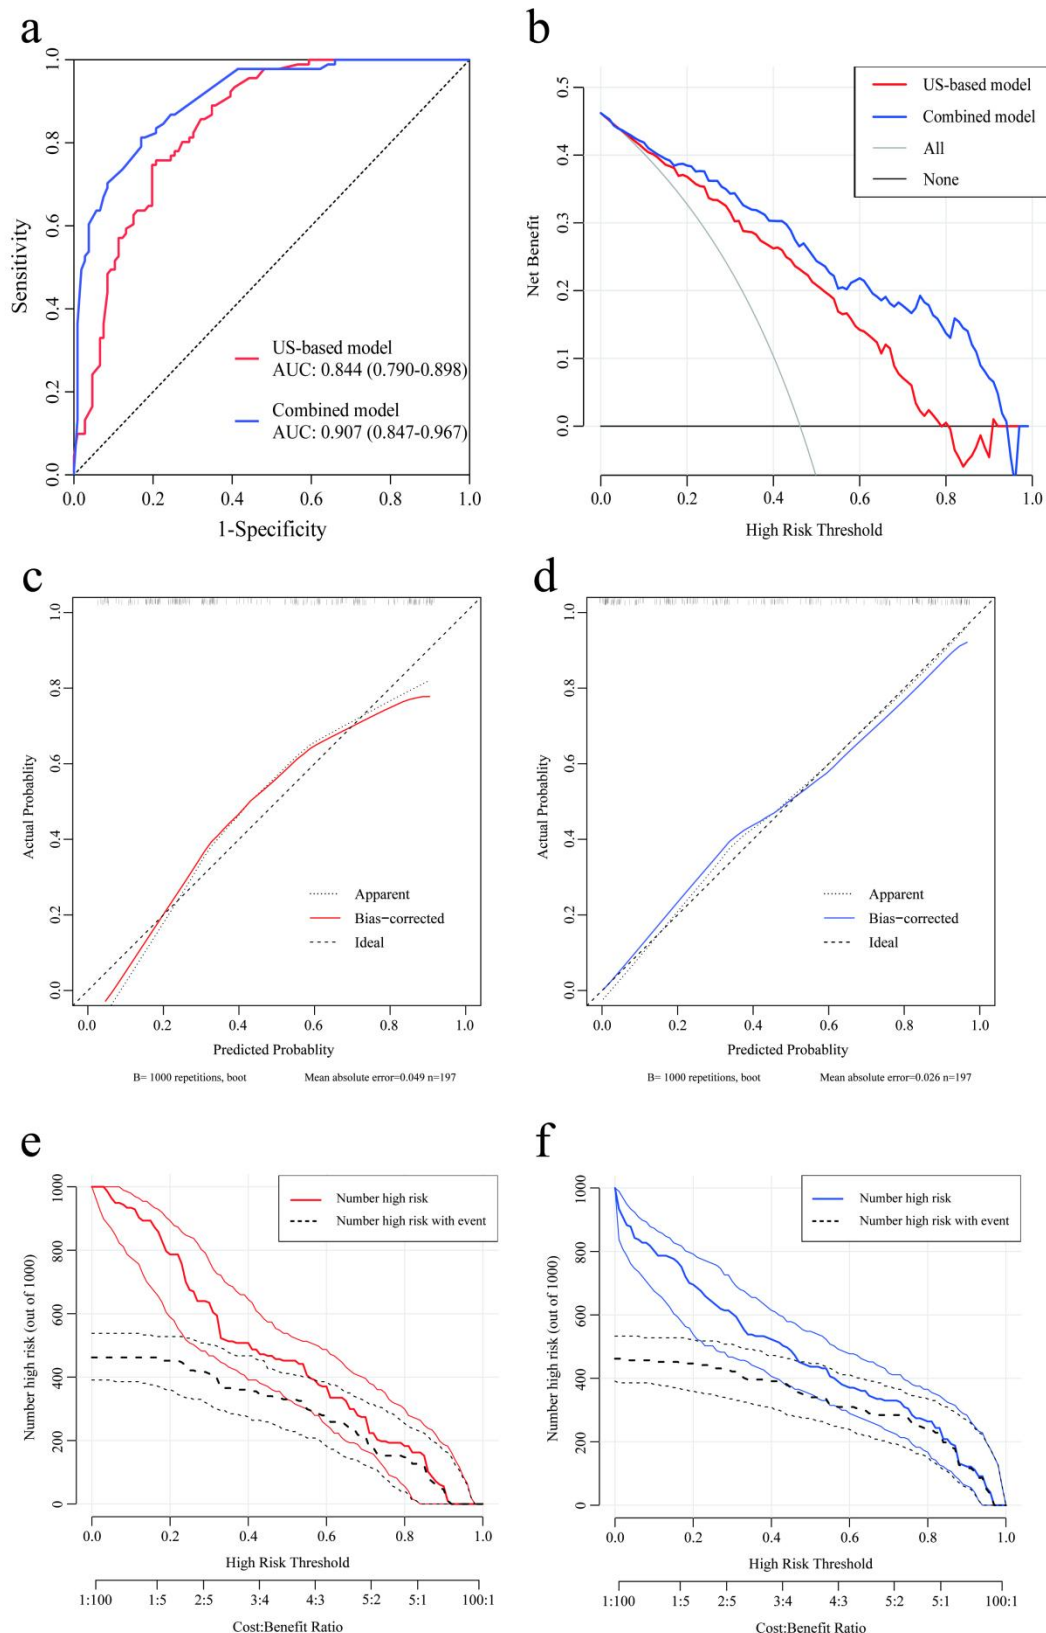

**Supplementary Figure 2.** The receiver operating characteristic (ROC) curve, decision curve analysis (DCA), calibration curve, and clinical impact curve (CIC) of the US-based and combined US-pathology nomogram models in the validation group. (a) The area under the receiver operating characteristic curve (AUC) of the US-based

and combined models are 0.844 (0.790–0.898) and 0.907 (0.847–0.967), respectively. (b) DCA for the US-based (red) and combined (blue) models in the validation group. The red and blue lines represent the two models. The gray line represents the assumption that all patients were responders. The black line represents the hypothesis that no patients were responders. (c and d) Calibration curves of the US-based model (c) and the combined model (d) in the validation group. In the calibration curves, a dotted line at a 45° angle represents perfect calibration. (e and f) CIC for the US-based model (e) and the combined model (f) in the validation group. CIC showed the model's estimated number that would be declared high risk for each risk threshold and the proportion of true positive patients.
